# Supplementary material for: One dimensional MOSFETs for sub-5 nm high-performance applications: a case of Sb2Se3 nanowires
Source: Royal Society of Chemistry journal article supplement (doi:10.1039/d2cp05132j), 2022-12-05
Supplement: d2cp05132j2.pdf [file d2cp05132j2.pdf]

**Figure s1.** *Band structures of  $Sb_2Se_3$  with the spin-orbit coupling effect.  $\epsilon F$  is referred as 0 eV.*
