# Supplementary material for: One dimensional MOSFETs for sub-5 nm high-performance applications: a case of Sb2Se3 nanowires
Source: Royal Society of Chemistry journal article supplement (doi:10.1039/d2cp05132j), 2022-12-05
Supplement: d2cp05132j3.pdf [file d2cp05132j3.pdf]

**The Supplemental Material for “One dimensional MOSFETs for sub-5 nm high performance applications: a case of Sb<sub>2</sub>Se<sub>3</sub> nanowires”**

Xingyi Tan<sup>1</sup>, Qiang Li<sup>2</sup>, Dahua Ren<sup>2</sup>

<sup>1</sup>*Department of Physics, Chongqing Three Gorges University, Wanzhou, 404100, China*

<sup>2</sup>*College of Intelligent systems science and engineering, Hubei Minzu University, Enshi, 445000, China*

**Table s1.** The doping concentration and the maximum currents

| Doping type | Doping concentration (/m) | Maximum currents ( $\mu\text{A}/\mu\text{m}$ ) |
|-------------|---------------------------|------------------------------------------------|
|             | $6 \times 10^7$           | 85.03                                          |
| P-type      | $3 \times 10^8$           | 100.33                                         |
|             | $6 \times 10^8$           | 111.59                                         |
| N-type      | $1 \times 10^7$           | 148.86                                         |

**Table s2.** Criteria of the sub-5 nm Lg GAA Sb<sub>2</sub>Se<sub>3</sub> FETs' ballistic efficeicny versus the 2028 needs of the ITRS 2013 for the HP and LP applications. The doping concentration is  $N_n=3\times 10^7 \text{ m}^{-1}$ .

|                | $L_g$<br>(nm) | $L_{UL}$<br>(nm) | $SS$<br>(mV/dec) | $I_{off}$<br>( $\mu\text{A}/\mu\text{m}$ ) | $I_{on}$<br>( $\mu\text{A}/\mu\text{m}$ ) | $I_{on}/I_{off}$  | $C_t$<br>(fF/ $\mu\text{m}$ ) | $\tau$ (ps) | PDP<br>(fJ/ $\mu\text{m}$ ) |
|----------------|---------------|------------------|------------------|--------------------------------------------|-------------------------------------------|-------------------|-------------------------------|-------------|-----------------------------|
| <b>HP</b>      | 5             | 0                | 197.7            | 0.1                                        | 2.627                                     | $2.63\times 10^1$ | -                             | -           | -                           |
|                |               | 1                | 150.2            | 0.1                                        | 734.25                                    | $7.34\times 10^3$ | -                             | -           | -                           |
|                |               | 2                | 122.4            | 0.1                                        | 3599.588                                  | $3.60\times 10^4$ | 0.25                          | 0.13        | 0.31                        |
|                |               | 3                | 103.4            | 0.1                                        | 3123.159                                  | $3.12\times 10^4$ | 0.20                          | 0.12        | 0.25                        |
|                | 3             | 0                | 389.2            | 0.1                                        | -                                         | -                 | -                             | -           | -                           |
|                |               | 1                | 257.4            | 0.1                                        | -                                         | -                 | -                             | -           | -                           |
|                |               | 2                | 186.1            | 0.1                                        | 83.05                                     | $8.30\times 10^2$ | -                             | -           | -                           |
|                |               | 3                | 150.1            | 0.1                                        | 1002.096                                  | $1.00\times 10^4$ | 0.15                          | 0.28        | 0.18                        |
|                | 1             | 1                | 845.2            | 0.1                                        | -                                         | -                 | -                             | -           | -                           |
|                |               | 2                | 423.5            | 0.1                                        | -                                         | -                 | -                             | -           | -                           |
|                |               | 3                | 255.0            | 0.1                                        | -                                         | -                 | -                             | -           | -                           |
|                | <b>LP</b>     | 5                | 0                | 197.7                                      | $5\times 10^{-5}$                         | -                 | -                             | -           | -                           |
| 1              |               |                  | 150.2            | $5\times 10^{-5}$                          | -                                         | -                 | -                             | -           | -                           |
| 2              |               |                  | 122.4            | $5\times 10^{-5}$                          | -                                         | -                 | -                             | -           | -                           |
| 3              |               |                  | 103.4            | $5\times 10^{-5}$                          | 8.359                                     | $1.67\times 10^5$ | -                             | -           | -                           |
| 3              |               | 0                | 389.2            | $5\times 10^{-5}$                          | -                                         | -                 | -                             | -           | -                           |
|                |               | 1                | 257.4            | $5\times 10^{-5}$                          | -                                         | -                 | -                             | -           | -                           |
|                |               | 2                | 186.1            | $5\times 10^{-5}$                          | -                                         | -                 | -                             | -           | -                           |
|                |               | 3                | 150.1            | $5\times 10^{-5}$                          | -                                         | -                 | -                             | -           | -                           |
| 1              |               | 1                | 845.2            | $5\times 10^{-5}$                          | -                                         | -                 | -                             | -           | -                           |
|                |               | 2                | 423.5            | $5\times 10^{-5}$                          | -                                         | -                 | -                             | -           | -                           |
|                |               | 3                | 255.0            | $5\times 10^{-5}$                          | -                                         | -                 | -                             | -           | -                           |
| <b>ITRS</b>    |               |                  |                  |                                            |                                           |                   |                               |             |                             |
| <b>HP</b>      | 5.1           | -                | -                | 0.1                                        | 900                                       | $9.00\times 10^3$ | 0.6                           | 0.423       | 0.24                        |
| <b>ITRS</b>    |               |                  |                  |                                            |                                           |                   |                               |             |                             |
| <b>LP 2028</b> | 5.9           | -                | -                | $5\times 10^{-5}$                          | 295                                       | $5.90\times 10^6$ | 0.69                          | 1.493       | 0.28                        |

$L_g$ : the gate length.  $L_{UL}$ : the underlap length.  $SS$ : the subthreshold swing.  $I_{off}$ : the off-state current.  $I_{on}$ : the on-state current.  $C_g$ : the gate capacitance.  $\tau$ : the delay time. PDP: the power dissipation.

**Table s3.** Criteria of the sub-5 nm Lg GAA Sb<sub>2</sub>Se<sub>3</sub> FETs' ballistic efficiency versus the 2028 needs of the ITRS 2013 for the HP and LP applications. The doping concentration is  $N_n=6\times 10^7 \text{ m}^{-1}$ .

|                | $L_g$<br>(nm) | $L_{UL}$<br>(nm) | $SS$<br>(mV/dec) | $I_{off}$<br>( $\mu\text{A}/\mu\text{m}$ ) | $I_{on}$<br>( $\mu\text{A}/\mu\text{m}$ ) | $I_{on}/I_{off}$  | $C_t$<br>(fF/ $\mu\text{m}$ ) | $\tau$ (ps) | PDP<br>(fJ/ $\mu\text{m}$ ) |
|----------------|---------------|------------------|------------------|--------------------------------------------|-------------------------------------------|-------------------|-------------------------------|-------------|-----------------------------|
| <b>HP</b>      | 5             | 0                | 248.9            | 0.1                                        | -                                         | -                 | -                             | -           | -                           |
|                |               | 1                | 173.9            | 0.1                                        | 115.175                                   | $1.15\times 10^3$ | -                             | -           | -                           |
|                |               | 2                | 124.1            | 0.1                                        | 2792.187                                  | $2.79\times 10^4$ | 0.32                          | 0.22        | 0.39                        |
|                |               | 3                | 94.5             | 0.1                                        | 2883.088                                  | $2.88\times 10^4$ | 0.25                          | 0.17        | 0.31                        |
|                | 3             | 0                | 505.3            | 0.1                                        | -                                         | -                 | -                             | -           | -                           |
|                |               | 1                | 284.2            | 0.1                                        | -                                         | -                 | -                             | -           | -                           |
|                |               | 2                | 176.0            | 0.1                                        | 3.29                                      | $3.29\times 10^1$ | -                             | -           | -                           |
|                |               | 3                | 153.5            | 0.1                                        | 402.588                                   | $1.03\times 10^3$ | -                             | -           | -                           |
|                | 1             | 1                | 704.8            | 0.1                                        | -                                         | -                 | -                             | -           | -                           |
|                |               | 2                | 520.2            | 0.1                                        | -                                         | -                 | -                             | -           | -                           |
|                |               | 3                | 342.0            | 0.1                                        | -                                         | -                 | -                             | -           | -                           |
|                | <b>LP</b>     | 5                | 0                | 248.9                                      | $5\times 10^{-5}$                         | -                 | -                             | -           | -                           |
| 1              |               |                  | 173.9            | $5\times 10^{-5}$                          | -                                         | -                 | -                             | -           | -                           |
| 2              |               |                  | 124.1            | $5\times 10^{-5}$                          | -                                         | -                 | -                             | -           | -                           |
| 3              |               |                  | 94.5             | $5\times 10^{-5}$                          | 8.103                                     | $1.62\times 10^5$ | -                             | -           | -                           |
| 3              |               | 0                | 505.3            | $5\times 10^{-5}$                          | -                                         | -                 | -                             | -           | -                           |
|                |               | 1                | 284.2            | $5\times 10^{-5}$                          | -                                         | -                 | -                             | -           | -                           |
|                |               | 2                | 176.0            | $5\times 10^{-5}$                          | -                                         | -                 | -                             | -           | -                           |
|                |               | 3                | 153.5            | $5\times 10^{-5}$                          | -                                         | -                 | -                             | -           | -                           |
| 1              |               | 1                | 704.8            | $5\times 10^{-5}$                          | -                                         | -                 | -                             | -           | -                           |
|                |               | 2                | 520.2            | $5\times 10^{-5}$                          | -                                         | -                 | -                             | -           | -                           |
|                |               | 3                | 342.0            | $5\times 10^{-5}$                          | -                                         | -                 | -                             | -           | -                           |
| <b>ITRS</b>    |               |                  |                  |                                            |                                           |                   |                               |             |                             |
| <b>HP</b>      | 5.1           | -                | -                | 0.1                                        | 900                                       | $9.00\times 10^3$ | 0.6                           | 0.423       | 0.24                        |
| <b>2028</b>    |               |                  |                  |                                            |                                           |                   |                               |             |                             |
| <b>ITRS</b>    |               |                  |                  |                                            |                                           |                   |                               |             |                             |
| <b>LP 2028</b> | 5.9           | -                | -                | $5\times 10^{-5}$                          | 295                                       | $5.90\times 10^6$ | 0.69                          | 1.493       | 0.28                        |

$L_g$ : the gate length.  $L_{UL}$ : the underlap length.  $SS$ : the subthreshold swing.  $I_{off}$ : the off-state current.  $I_{on}$ : the on-state current.  $C_g$ : the gate capacitance.  $\tau$ : the delay time. PDP: the power dissipation.
