# Supplementary figures and images for: One dimensional MOSFETs for sub-5 nm high-performance applications: a case of Sb2Se3 nanowires
Source: Royal Society of Chemistry journal article supplement (doi:10.1039/d2cp05132j), 2022-12-05

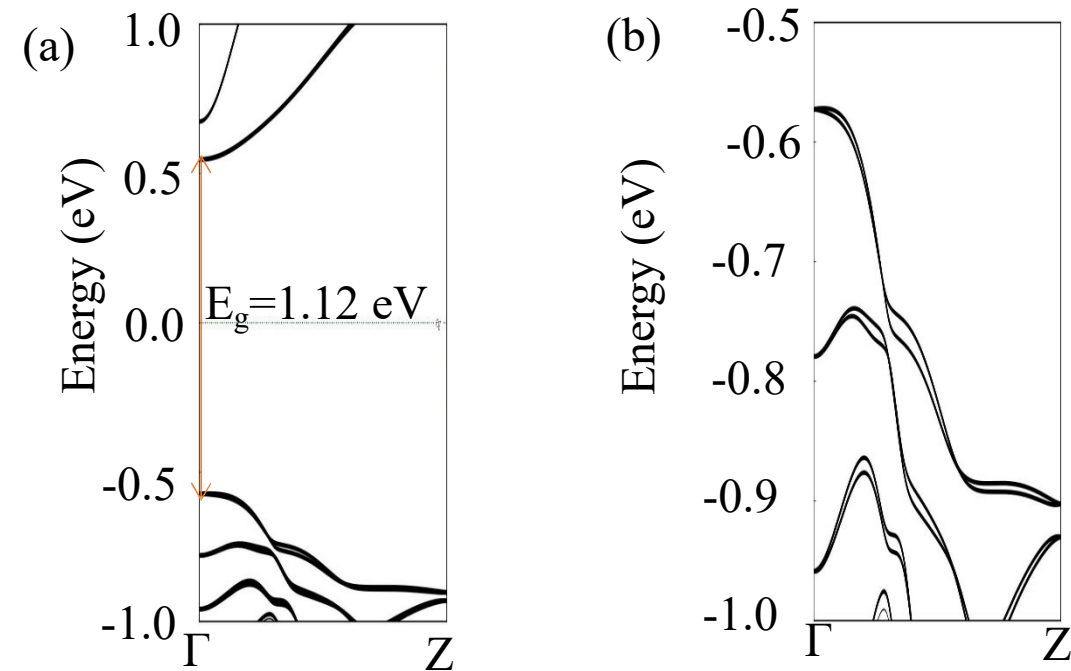

Fig. s1

Supplement: d2cp05132j1.pdf [file d2cp05132j1.pdf]
